# Supplementary material for: The Escherichia coli MarA protein regulates the ycgZ‐ymgABC operon to inhibit biofilm formation
Source: PubMed Central journal article supplement (PMC6900184; doi:10.1111/mmi.14386), 2019-09-29
Supplement: MMI-112-1609-s001.pdf [file MMI-112-1609-s001.pdf]

## Supplementary Information

### The *Escherichia coli* MarA protein regulates the *ycgZ-ymgABC* operon to inhibit biofilm formation

Rachel A. Kettles<sup>1</sup>, Natalia Tschowri<sup>2</sup>, Kevin J. Lyons<sup>1</sup>, Prateek Sharma<sup>1</sup>, Regine Hengge<sup>2</sup>, Mark A. Webber<sup>3</sup>, David C. Grainger<sup>1\*</sup>

\*for correspondence

email: [d.grainger@bham.ac.uk](mailto:d.grainger@bham.ac.uk)

Tel +44 (0)121 414 5437

<sup>1</sup>Institute of Microbiology and Infection, School of Biosciences, University of Birmingham, Edgbaston, Birmingham B15 2TT, United Kingdom

<sup>2</sup>Institut für Biologie/Mikrobiologie, Humboldt-Universität zu Berlin, 10115 Berlin, Germany

<sup>3</sup>Quadram Institute Bioscience, Norwich Research Park, Norwich NR4 7UQ, United Kingdom

## *ycgZ.1*

ATATGCATTAGCACTAATTGCAAAAAATTAATTTATCATTCTGTACACATATTTTCGT  
ACAAGTTTGCTATTGTTACTTCACTTAACATTGATTAACATTTTTAACAGAGGCGTAGCATG

## *ycgZ.1 inv*

ATATGCATTAAAAACGTTAATCAGAAATTAATTTATCATTCTGTACACATATTTTCGT  
ACAAGTTTGCTATTGTTACTTCACTTAACATTGATTAACATTTTTAACAGAGGCGTAGCATG

## *ycgZ.1 Δ1*

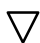

ATATGCATTAGCACTAATTGCAAAAATTAATTTATCATTCTGTACACATATTTTCGTA  
CAAGTTTGCTATTGTTACTTCACTTAACATTGATTAACATTTTTAACAGAGGCGTAGCATG

## *ycgZ.1 Δ5*

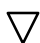

ATATGCATTAGCACTAATTGCAAAAATTTATCATTCTGTACACATATTTTCGTACAA  
GTTTGCTATTGTTACTTCACTTAACATTGATTAACATTTTTAACAGAGGCGTAGCATG

## *ycgZ.1 Δ10*

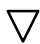

ATATGCATTAGCACTAATTGCAAAATCATTCTGTACACATATTTTCGTACAAGTTTG  
CTATTGTTACTTCACTTAACATTGATTAACATTTTTAACAGAGGCGTAGCATG

## *ycgZ.1 UP1*

ATATGCATTAGCACTAATTGCAAAACAATTAATTTATCATTCTGTACACATATTTTCGT  
ACAAGTTTGCTATTGTTACTTCACTTAACATTGATTAACATTTTTAACAGAGGCGTAGCATG

## *ycgZ.1 UP5*

ATATGCATTAGCACTAATTGCAAAACGATCAATTAATTTATCATTCTGTACACATATTTTCGT  
ACAAGTTTGCTATTGTTACTTCACTTAACATTGATTAACATTTTTAACAGAGGCGTAGCATG

## *ycgZ.1 UP10*

ATATGCATTAGCACTAATTGCAAAATCTGACGATCAATTAATTTATCATTCTGTACACATATTT  
CGTACAAGTTTGCTATTGTTACTTCACTTAACATTGATTAACATTTTTAACAGAGGCGTAGCATG

Figure 2a

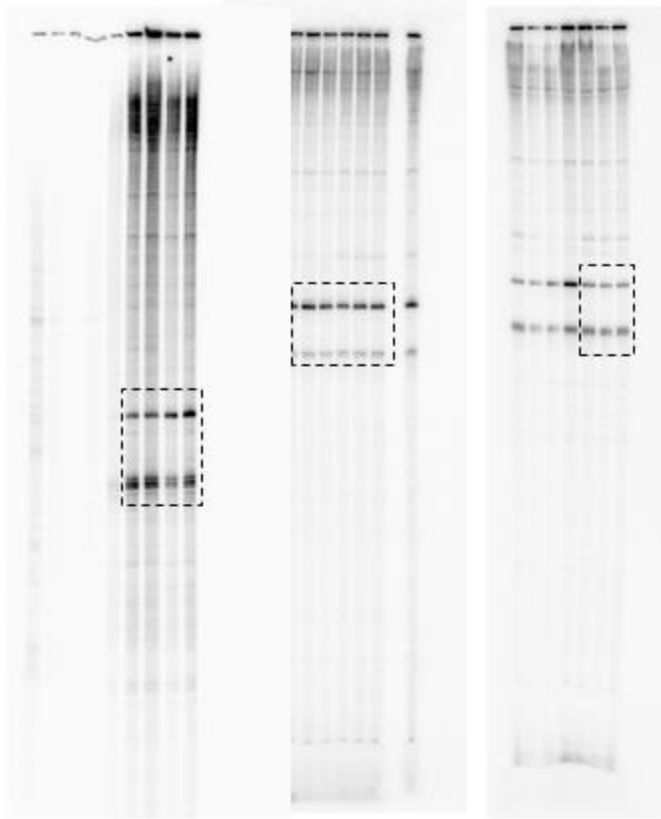

Figure S2

Figure 1b

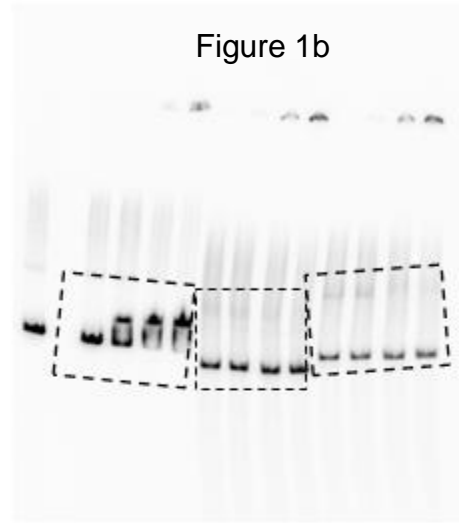

Figure 2b

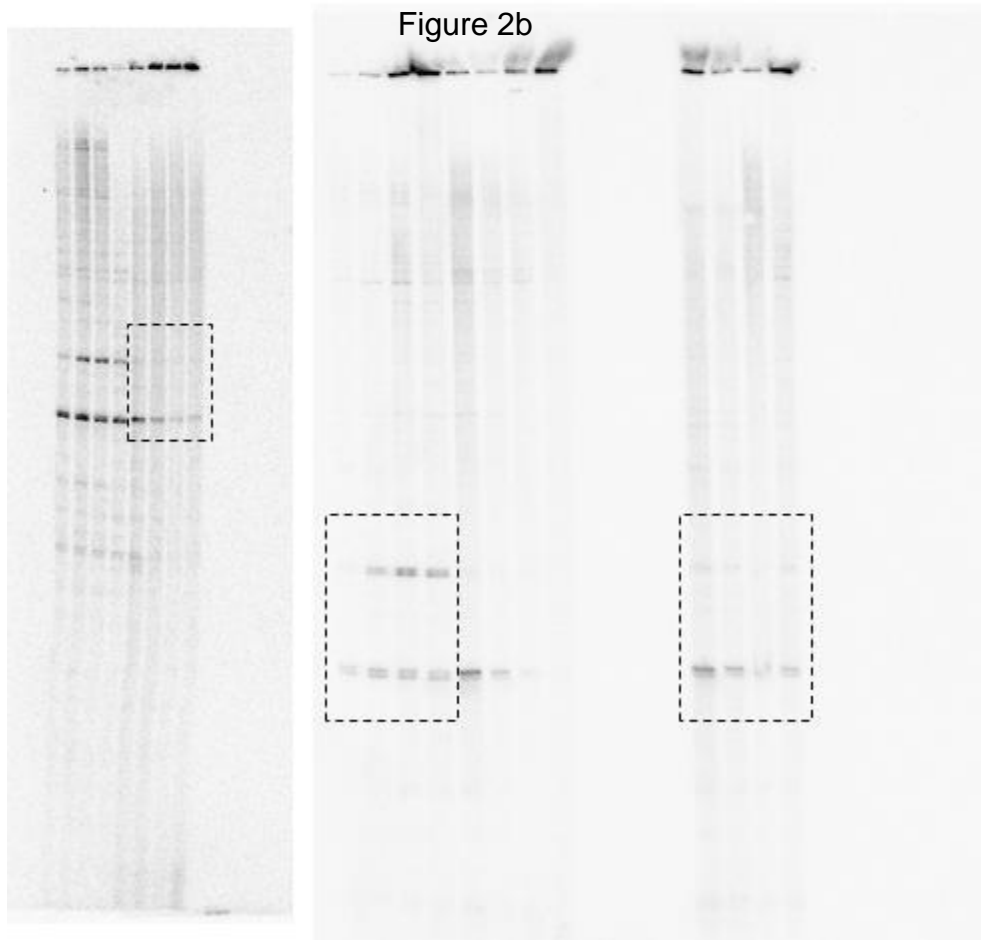

Figure 3b

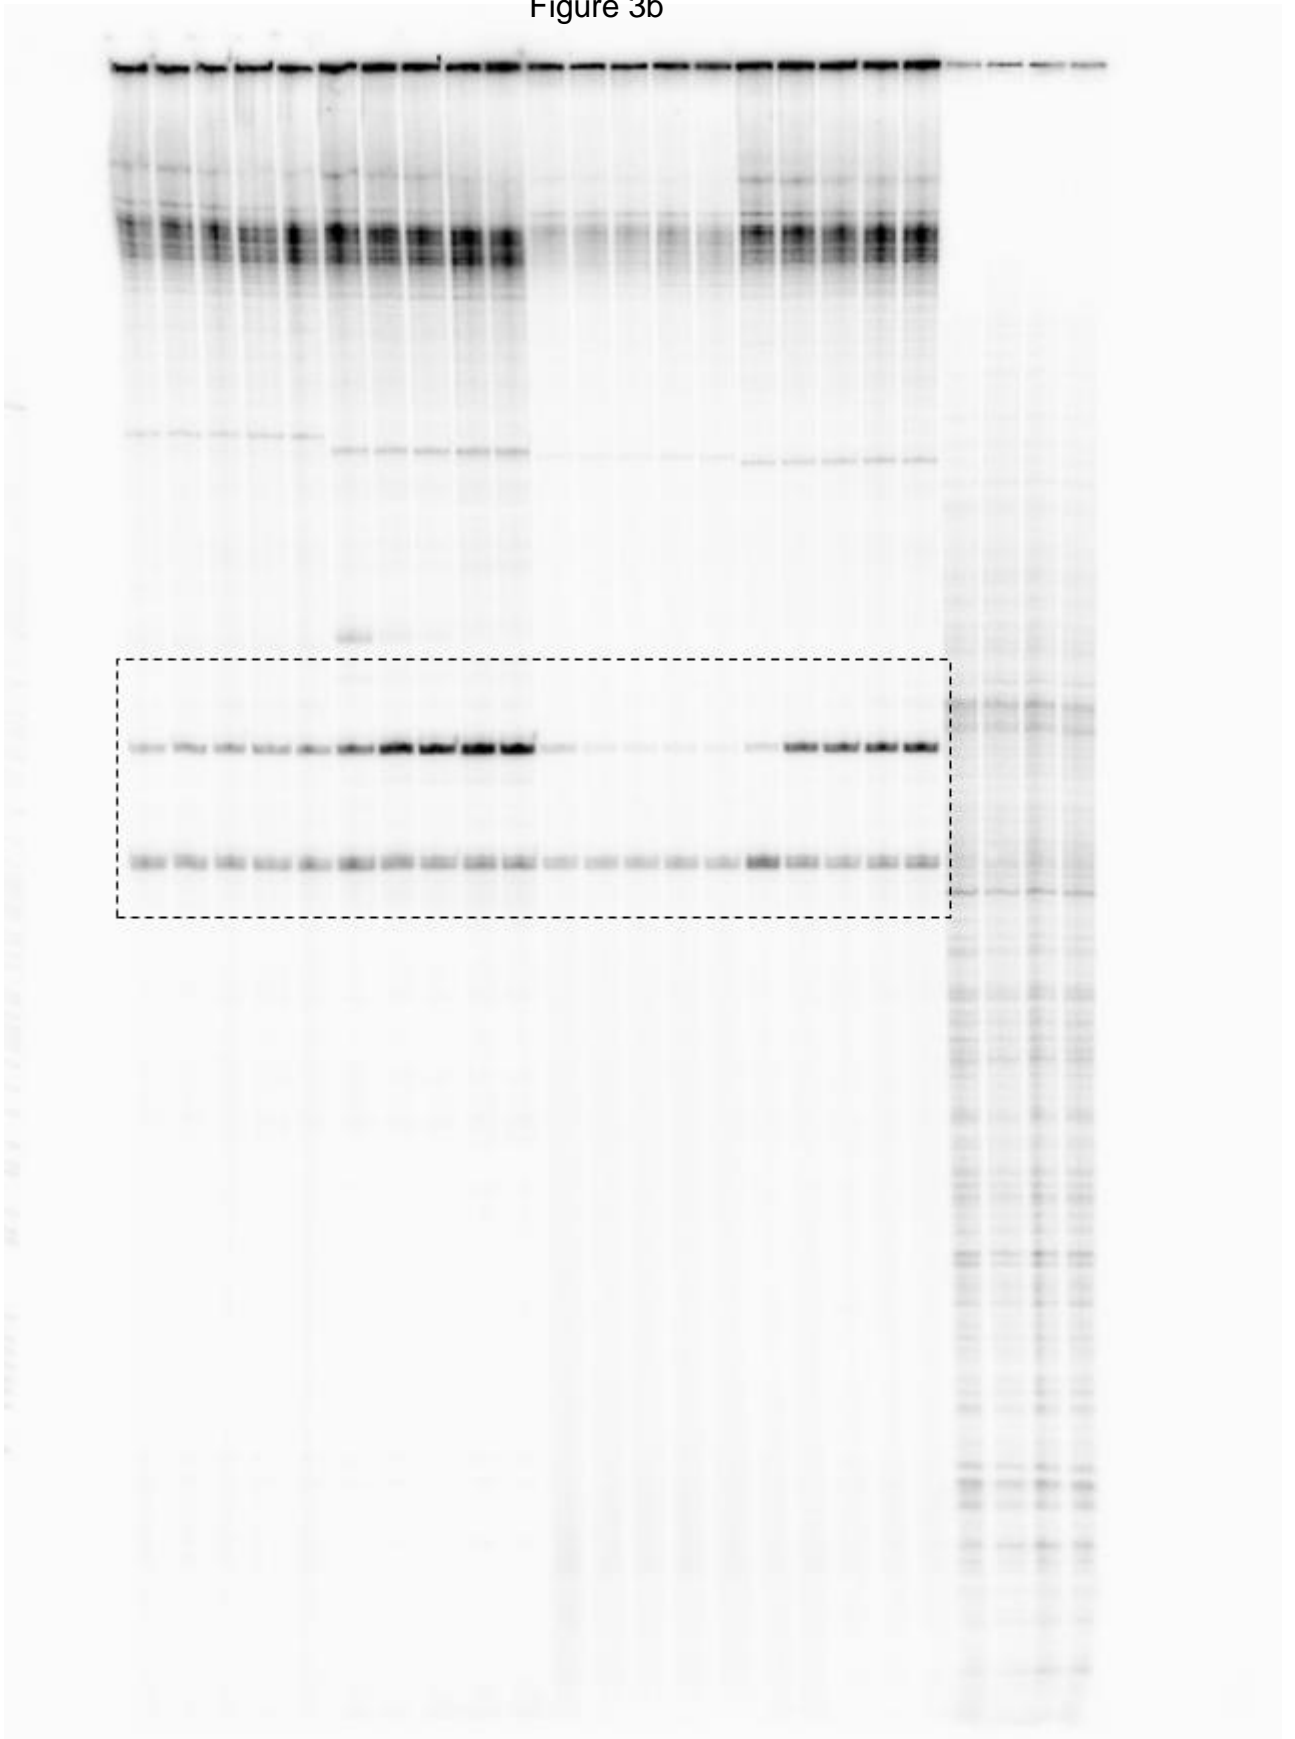

Figure 3b

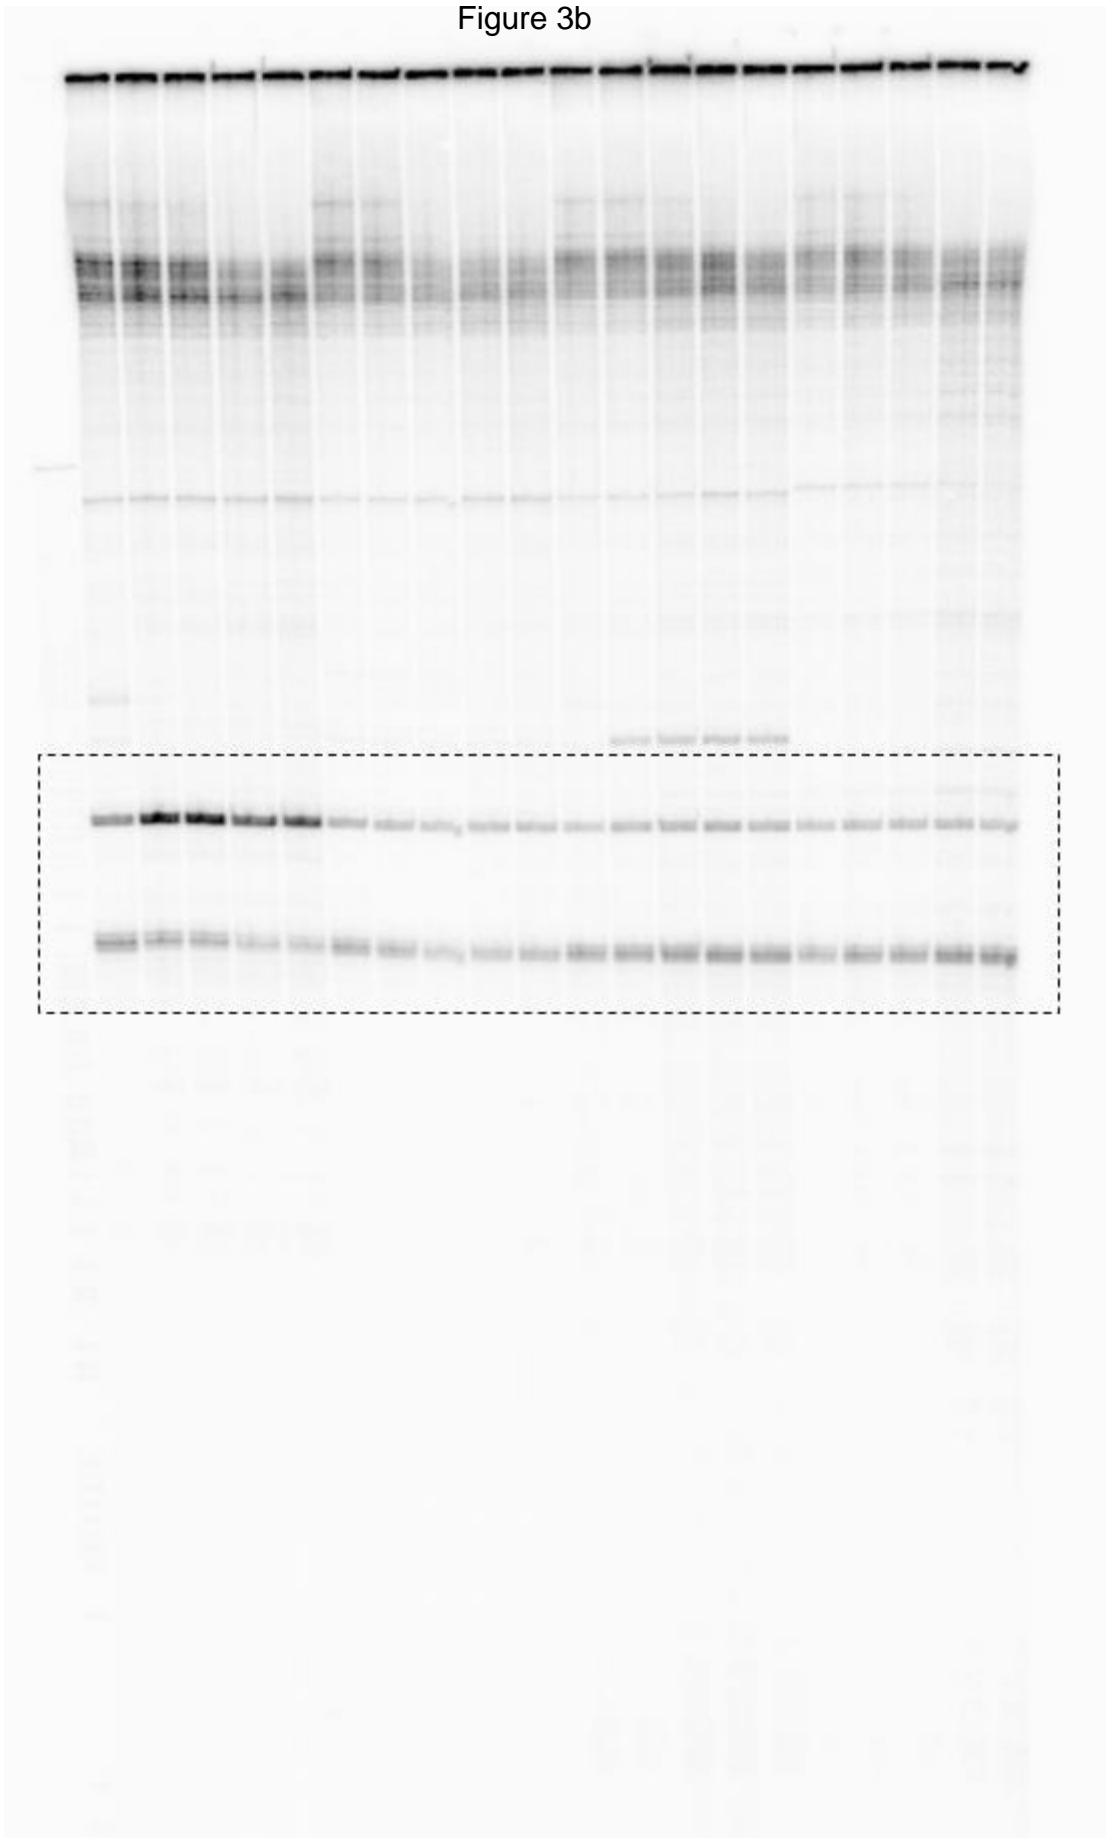

Figure 3c

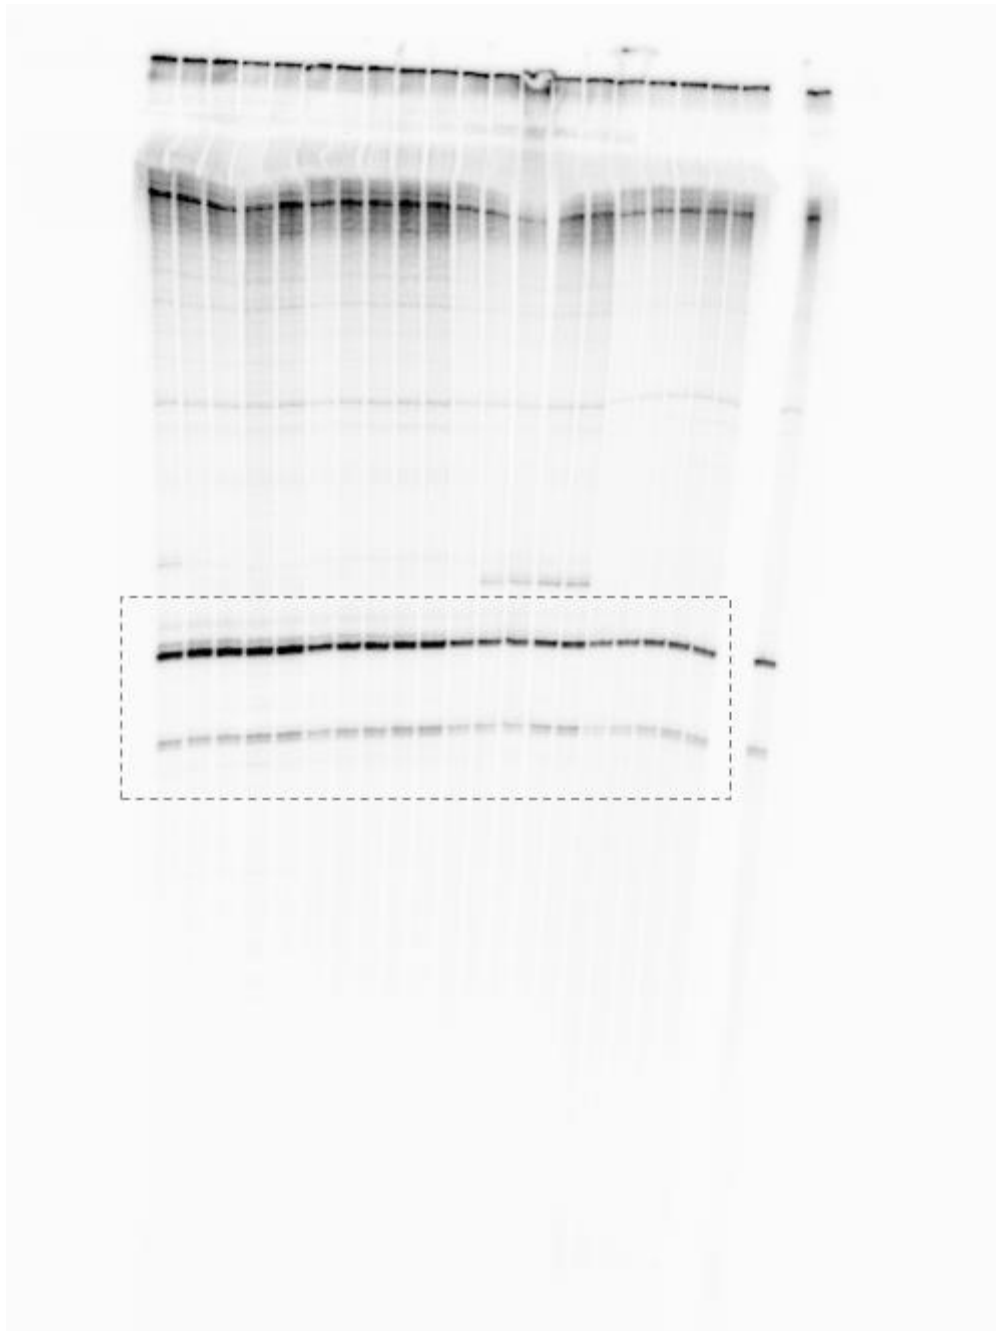

Figure 3c

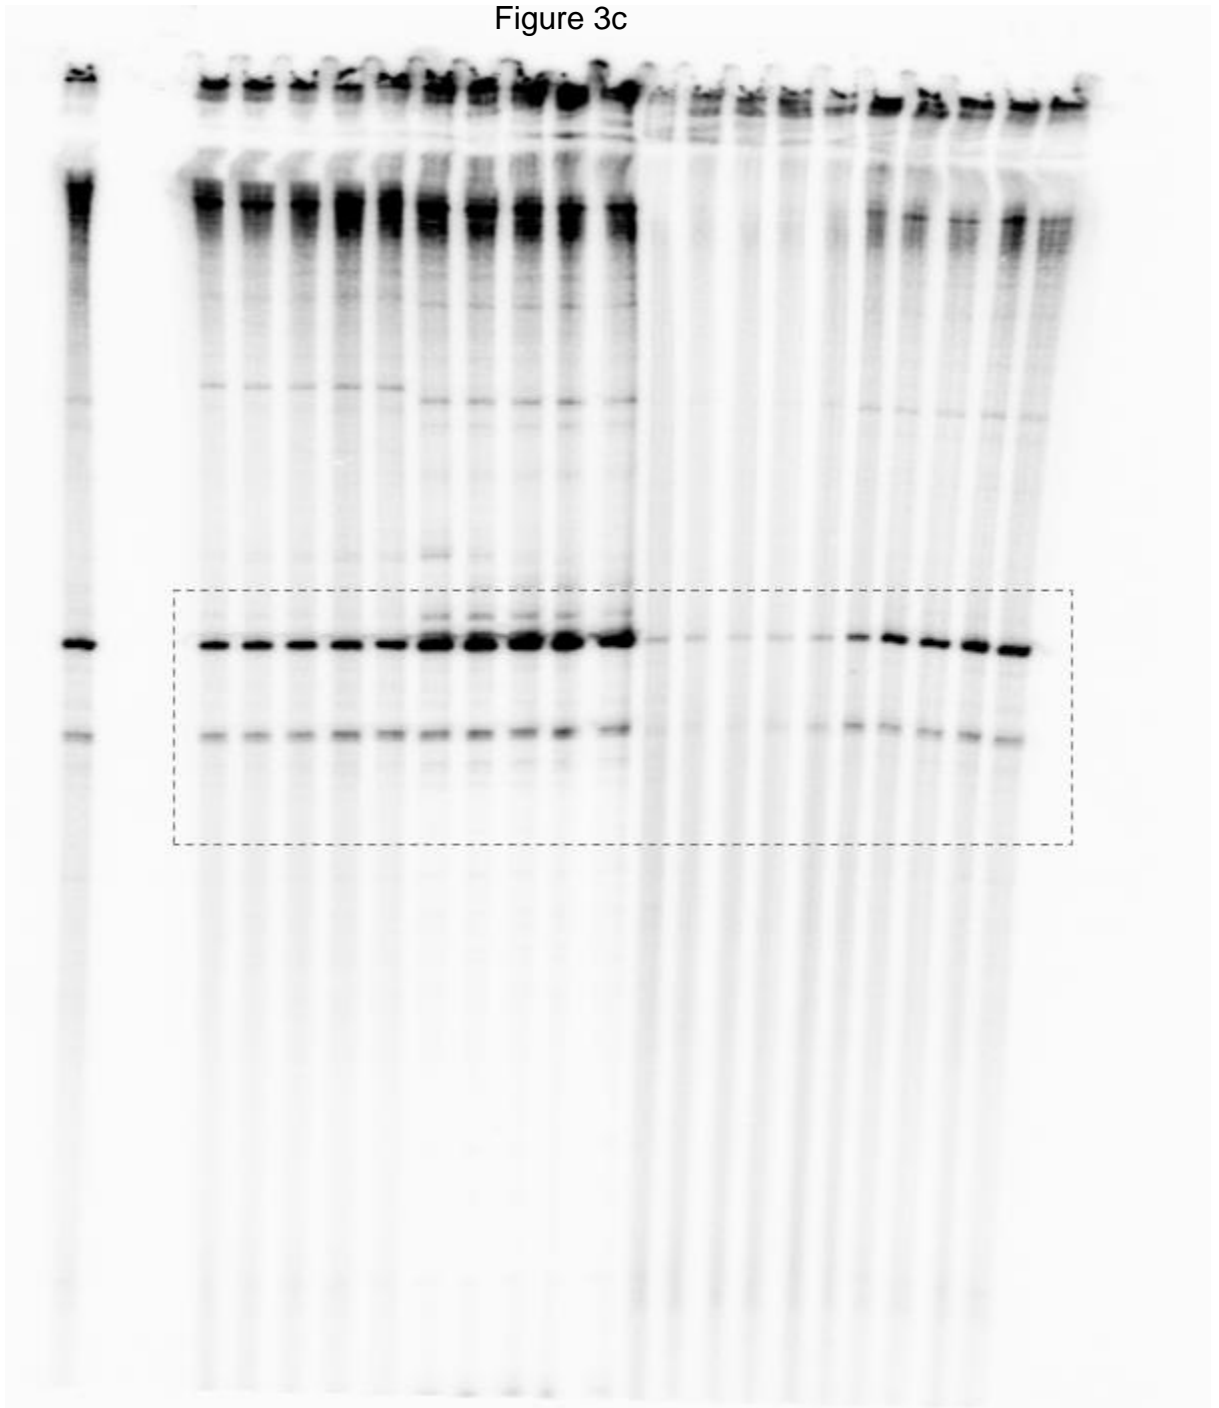

Figure 5

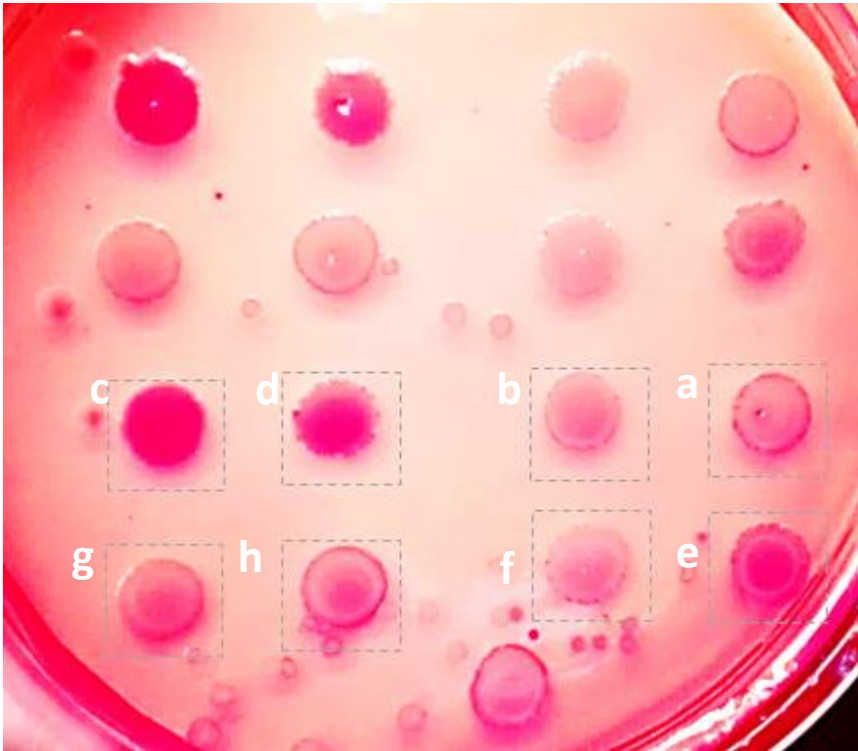

Repeat spotting of  
below two rows in  
the same order

Data shown in  
Figure 5.
